# Supplementary material
Source: PubMed Central journal article supplement (PMC6209543)
Supplement: CONC-25-e480-s001.pdf [file CONC-25-e480-s001.pdf]

## **Supplemental Materials for**

### **Opportunity is the greatest barrier to providing palliative care to advanced colorectal cancer patients: a survey of oncology clinicians' perceptions**

M.A. Earp PhD,\* A. Sinnarajah MD MPH,†‡§ M. Kerba MD,† P.A.Tang MD,† J. Rodriguez-Arguello BHSc,\* S. King MSc,|| S.M. Watanabe MD,# J.E. Simon MB ChB†‡||

#### **Listing of Supplemental Material(s):**

Supplemental Appendix 1: **Gastrointestinal oncology clinicians' perceptions questionnaire: A questionnaire to explore the barriers to implementing earlier palliative care**

**Gastrointestinal oncology clinicians'  
perceptions questionnaire:**

A questionnaire to explore the barriers to  
implementing earlier palliative care

# Participant Information

Part 1 of 5

What is your primary professional role ?

- ☐ Clinic Nurse  
☐ Nurse Practitioner  
☐ Nurse Navigator  
☐ Doctor  
☐ Social worker  
☐ Administration (e.g. clinic manager)  
☐ Clerical  
☐ Other Allied Health  
☐ Other

If "Other Allied Health" or "Other", please specify:

In which cancer centre or catchment area do you primarily work ?

- ☐ Grand Prairie Cancer Centre  
☐ Cross Cancer Institute  
☐ Central Alberta Cancer Centre  
☐ Tom Baker Cancer Centre  
☐ Jack Ady Cancer Centre  
☐ Margery Yuill Cancer Centre  
☐ Community Cancer Centre  
☐ Other

If "Community Cancer Centre" or "Other", please specify:

In which discipline(s) do you work ?

- ☐ Medical oncology  
☐ Radiation oncology  
☐ Surgical oncology  
☐ Other

If "Other", please specify:

How often does your work involve care of metastatic colorectal cancer patients?

- ☐ Never  
☐ < 10 per month  
☐ 10-25 per month  
☐ > 25 per month

Your gender

- ☐ Female  
☐ Male

How many years have you been working in your professional role?

- ☐ I'm a trainee/student/resident  
☐ 0-2 years  
☐ 2-5 years  
☐ 5-10 years  
☐ 10-15 years  
☐ >15 years

Part 2 of 5

---

**How much do you agree with the following statements?**

**For me, a barrier to referring metastatic colorectal cancer patients to palliative care services (includes consultation and home care) is:**

|                                                                                             | Entirely<br>Disagree<br>Disagree | Mostly<br>Disagree    | Somewha<br>t Disagree | Neither<br>Agree nor  | Somewha<br>t Agree    | Mostly<br>Agree       | Entirely<br>Agree     | Don't<br>know         |
|---------------------------------------------------------------------------------------------|----------------------------------|-----------------------|-----------------------|-----------------------|-----------------------|-----------------------|-----------------------|-----------------------|
| 10) Patient distress at the term "palliative"?                                              | <input type="radio"/>            | <input type="radio"/> | <input type="radio"/> | <input type="radio"/> | <input type="radio"/> | <input type="radio"/> | <input type="radio"/> | <input type="radio"/> |
| 11) Lack of available palliative care providers and/or service restrictions in your region? | <input type="radio"/>            | <input type="radio"/> | <input type="radio"/> | <input type="radio"/> | <input type="radio"/> | <input type="radio"/> | <input type="radio"/> | <input type="radio"/> |
| 12) Referral pathway issues (e.g. when to refer, how to refer, simplicity of use)?          | <input type="radio"/>            | <input type="radio"/> | <input type="radio"/> | <input type="radio"/> | <input type="radio"/> | <input type="radio"/> | <input type="radio"/> | <input type="radio"/> |
| 13) There is little benefit for my patients from palliative care services.                  | <input type="radio"/>            | <input type="radio"/> | <input type="radio"/> | <input type="radio"/> | <input type="radio"/> | <input type="radio"/> | <input type="radio"/> | <input type="radio"/> |
| 14) Referring to palliative care is not one of my responsibilities.                         | <input type="radio"/>            | <input type="radio"/> | <input type="radio"/> | <input type="radio"/> | <input type="radio"/> | <input type="radio"/> | <input type="radio"/> | <input type="radio"/> |
| 15) Another barrier I face in referring patients to palliative care is:                     | <hr/>                            |                       |                       |                       |                       |                       |                       |                       |

Part 3 of 5

---

## How much do you agree with the following statements?

**For me, a barrier to working with palliative care team members is:**

| Entirely<br>Disagree<br>Disagree                                                                                                                               | Mostly<br>Disagree    | Somewha<br>t Disagree | Neither<br>Agree nor  | Somewha<br>t Agree    | Mostly<br>Agree       | Entirely<br>Agree     | Don't<br>Know         |
|----------------------------------------------------------------------------------------------------------------------------------------------------------------|-----------------------|-----------------------|-----------------------|-----------------------|-----------------------|-----------------------|-----------------------|
| 16) Role confusion when multiple professionals are involved? (i.e. who does what)                                                                              | <input type="radio"/> |
| 17) Sub-optimal transfer of documentation between the teams involved?                                                                                          | <input type="radio"/> |
| 18) Lack of a standard process for professional communication on patient issues (knowing who/when to use fax, e-mail, paging, phone, etc. to reach clinicians) | <input type="radio"/> |
| 19) Lack of process for executing new orders for patients who are at home (e.g. when a home care patient needs paracentesis)                                   | <input type="radio"/> |
| 20) Sub-optimal prior experience working with palliative care team members?                                                                                    | <input type="radio"/> |

21) If your prior experience working with palliative care team members was sub-optimal, please describe:

---

22) Another barrier I face in working with palliative care team members is:

---

# Addressing patients' palliative care needs

Part 4 of 5

---

**How much do you agree with the following statements?**

**A barrier to addressing metastatic colorectal cancer patients palliative care needs myself is:**

| Entirely<br>Disagree<br>Disagree                                                                               | Mostly<br>Disagree    | Somewha<br>t Disagree | Neither<br>Agree nor  | Somewha<br>t Agree    | Mostly<br>Agree       | Entirely<br>Agree     | Don't<br>Know         |
|----------------------------------------------------------------------------------------------------------------|-----------------------|-----------------------|-----------------------|-----------------------|-----------------------|-----------------------|-----------------------|
| 23) My capability (e.g. to manage physical, psychological and existential symptoms).                           | <input type="radio"/> |
| 24) Time and competing priorities in my work.                                                                  | <input type="radio"/> |
| 25) Managing palliative care needs is not part of my responsibility.                                           | <input type="radio"/> |
| 26) Concern about increasing patient distress.                                                                 | <input type="radio"/> |
| 27) Lack of meaningful benefit for patients.                                                                   | <input type="radio"/> |
| 28) There is no expectation and/or leadership support for addressing palliative care issues in my clinic area. | <input type="radio"/> |
| 29) Another barrier I face in addressing metastatic colorectal cancer patient's palliative care needs is:      | <hr/>                 |                       |                       |                       |                       |                       |                       |

Part 5 of 5

We are proposing a "routine" palliative care consultation pathway for all metastatic colorectal patients who fail first line chemotherapy.

|                                                                           |                       |                       |                       |                       |                       |                       |                       |                       |
|---------------------------------------------------------------------------|-----------------------|-----------------------|-----------------------|-----------------------|-----------------------|-----------------------|-----------------------|-----------------------|
| Entirely<br>Unlikely<br>nor Likely                                        |                       | Mostly<br>Unlikely    | Somewha<br>t Unlikely | Neither<br>Unlikely   | Somewha<br>t Likely   | Mostly<br>Likely      | Entirely<br>Likely    | Don't<br>Know         |
| 30) How likely would you be to recommend such a pathway to your patients? | <input type="radio"/> |

31) Please provide your ideas on how to improve integrating early palliative care into the management of metastatic colorectal cancer patients.
